# Supplementary material for: Molecular determinants of Neu5Ac binding to a tripartite ATP independent periplasmic (TRAP) transporter
Source: eLife journal article supplement (doi:10.7554/elife.98158), 2024-05-29

Figure 1—figure supplement 1 -inset

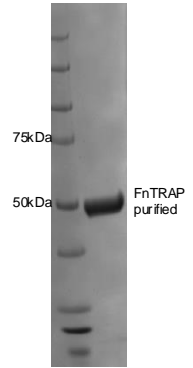

**Raw Gel:**

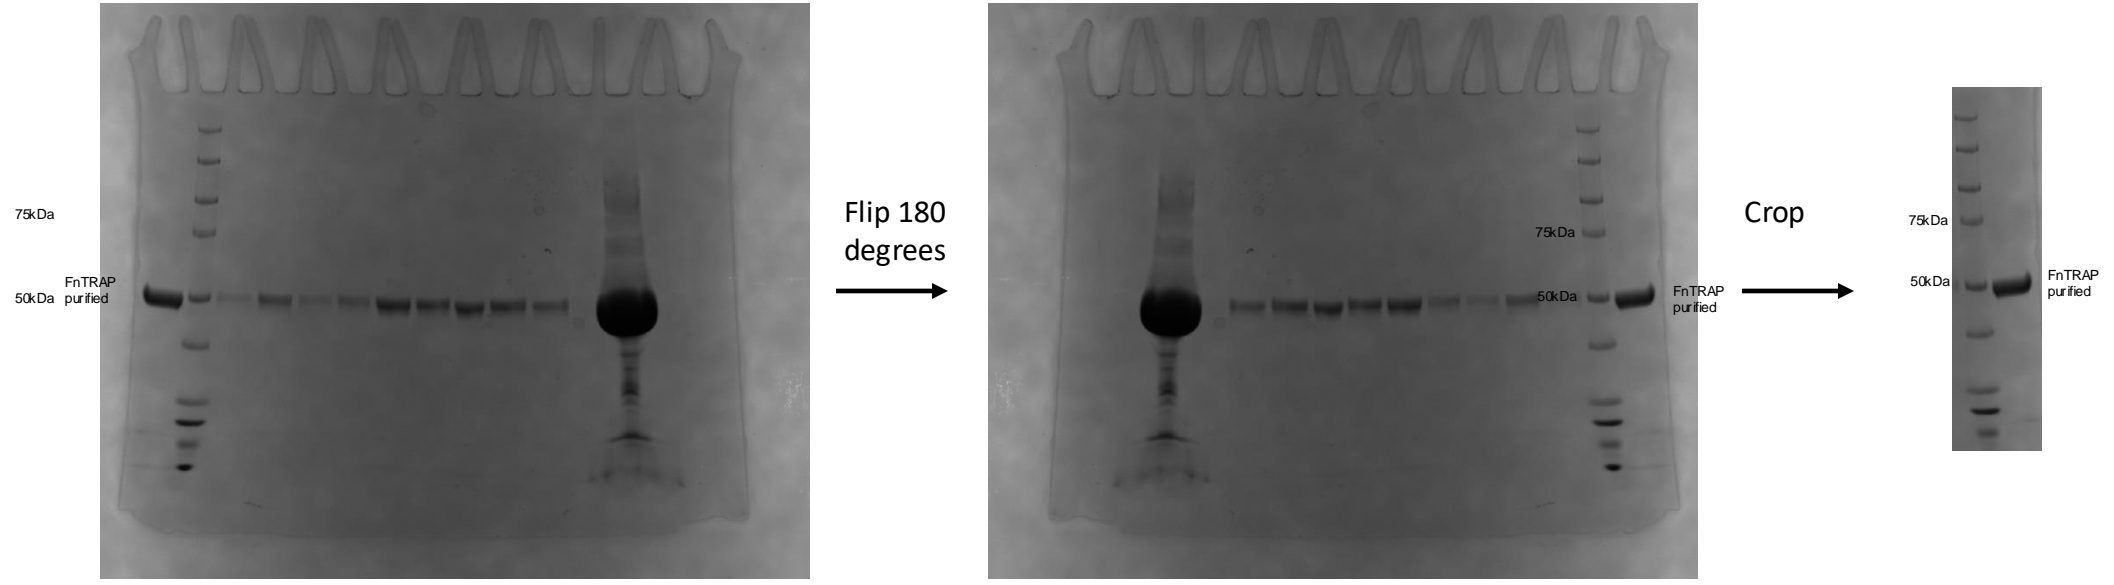

Supplement: fig1-figsupp1-data2 [file elife-98158-fig1-figsupp1-data2-v1.pdf]
